# Supplementary material for: Effect of Water Extract of Mangosteen Pericarp on Donepezil Pharmacokinetics in Mice
Source: MDPI journal article supplement (doi:10.3390/molecules26175246), 2021-08-30

**Supplementary data 1.** Fragment ion spectra of the tentative metabolites (M1-M7) and donepezil by product ion scan mode. (A) donepezil, (B) M1, (C) M2 and M3, (D) M4 and M5, and (E) M6 and M7.

# (A) donepezil: Product ion scan for $m/z$ 380

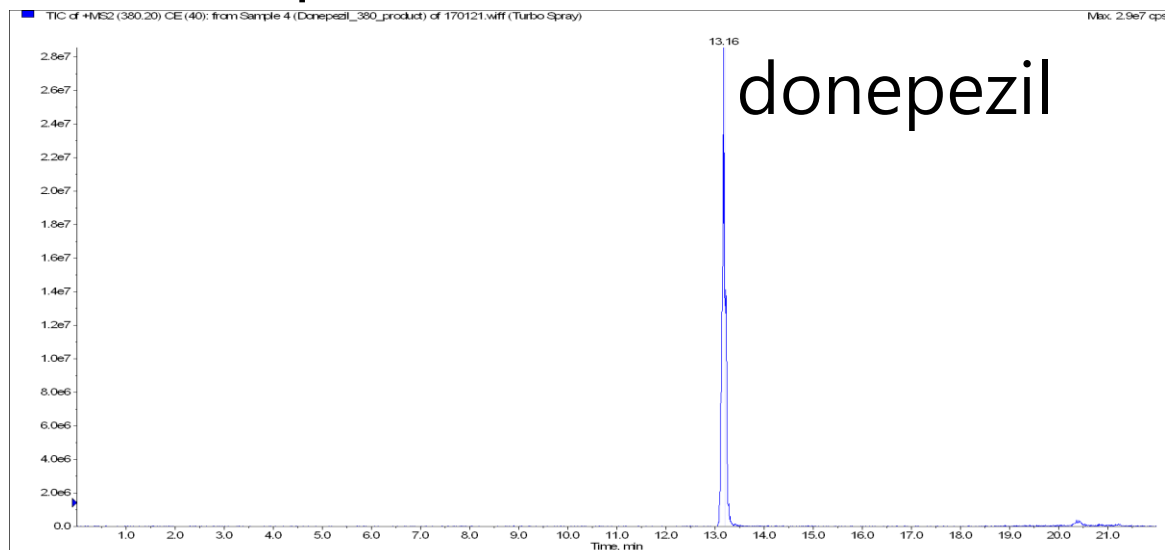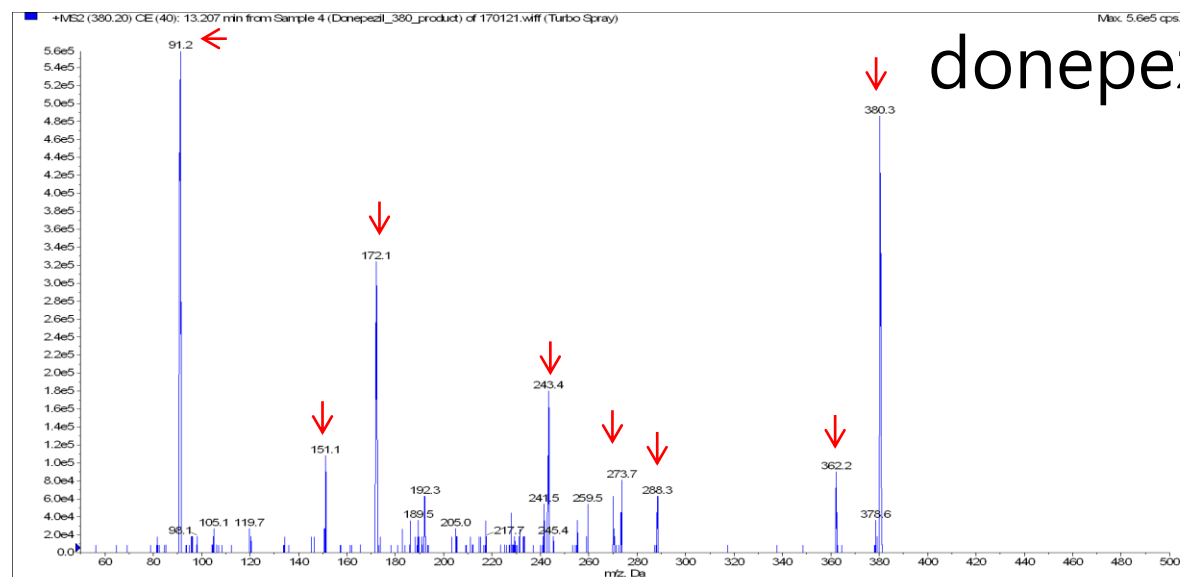

## (B) M1: Product ion scan for $m/z$ 542

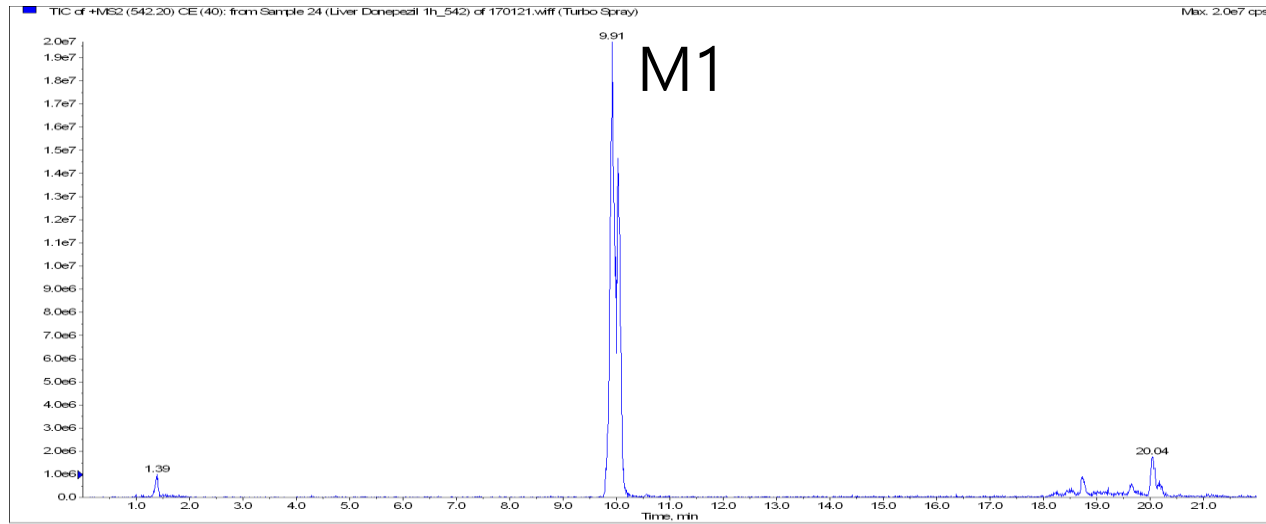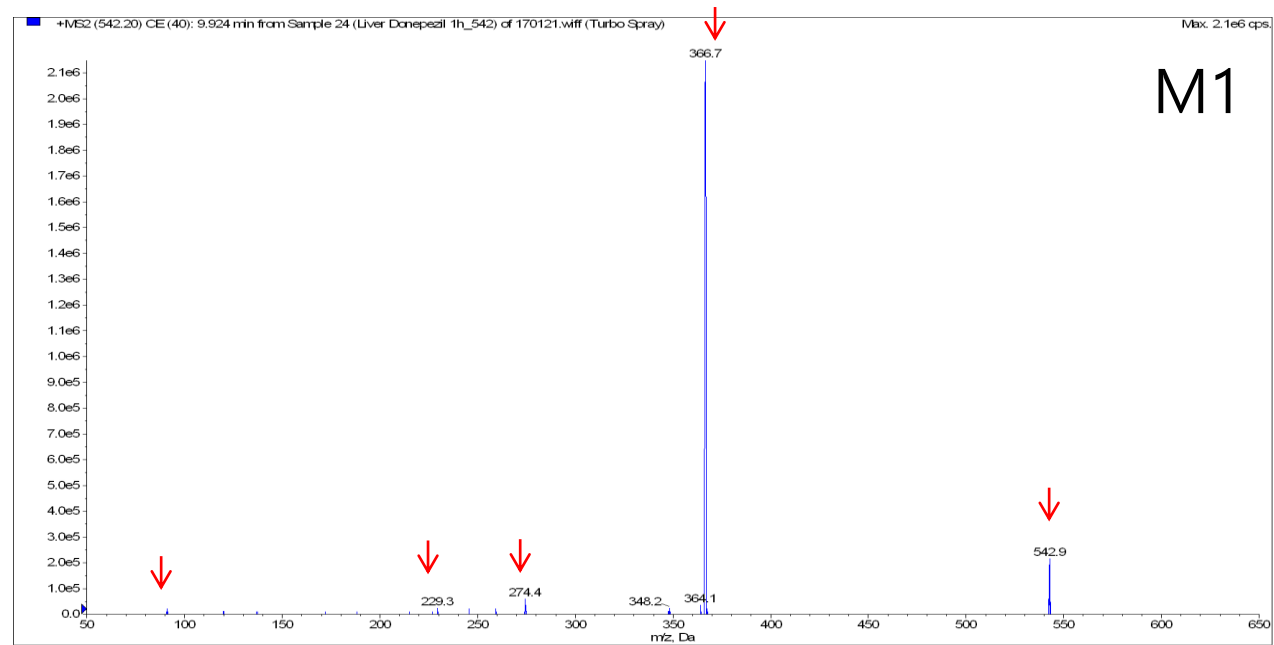

# (C)M2 and M3: Product ion scan for $m/z$ 366

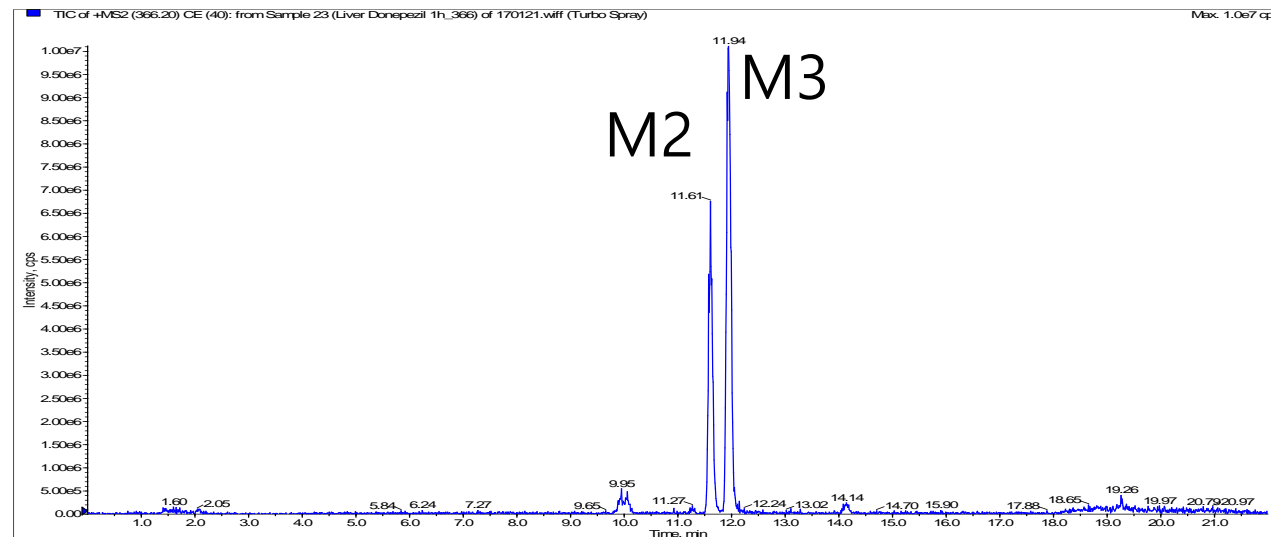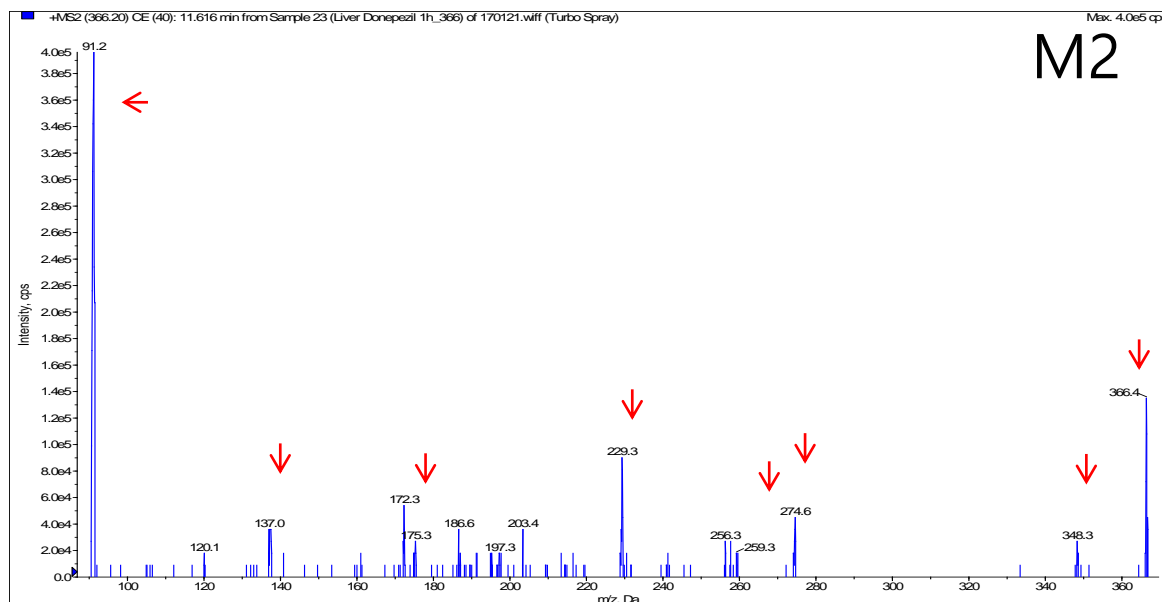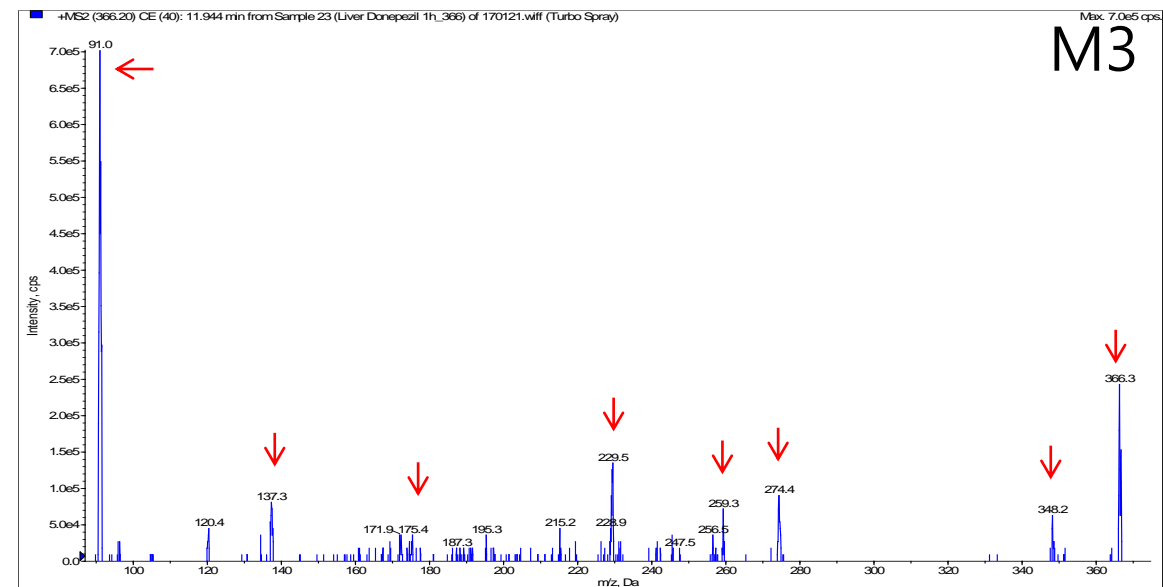

# (D) M4 and M5: Product ion scan for $m/z$ 396

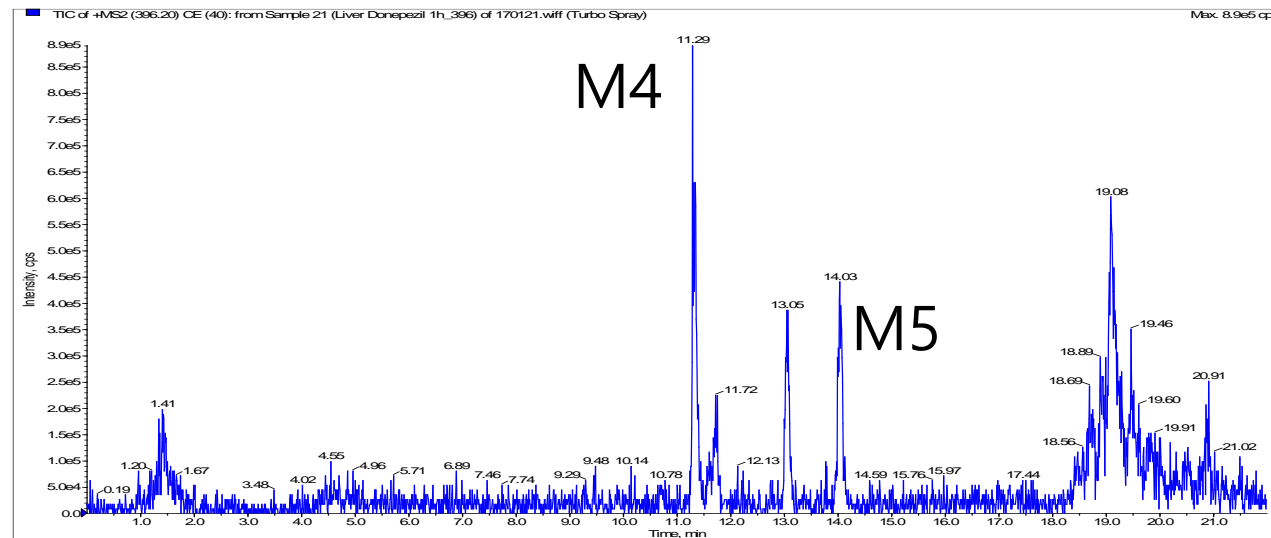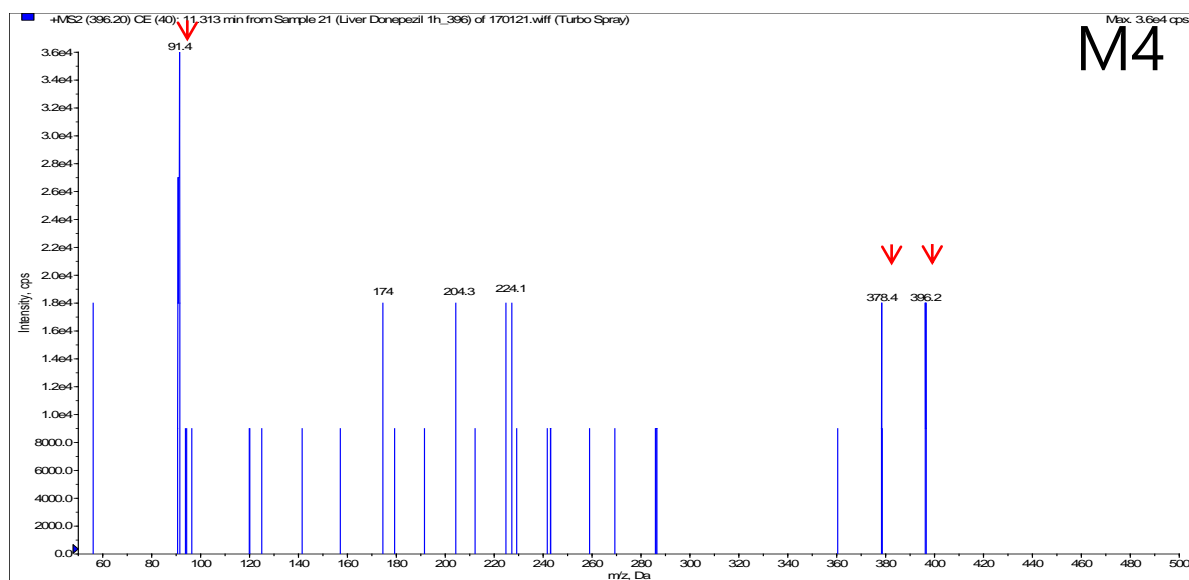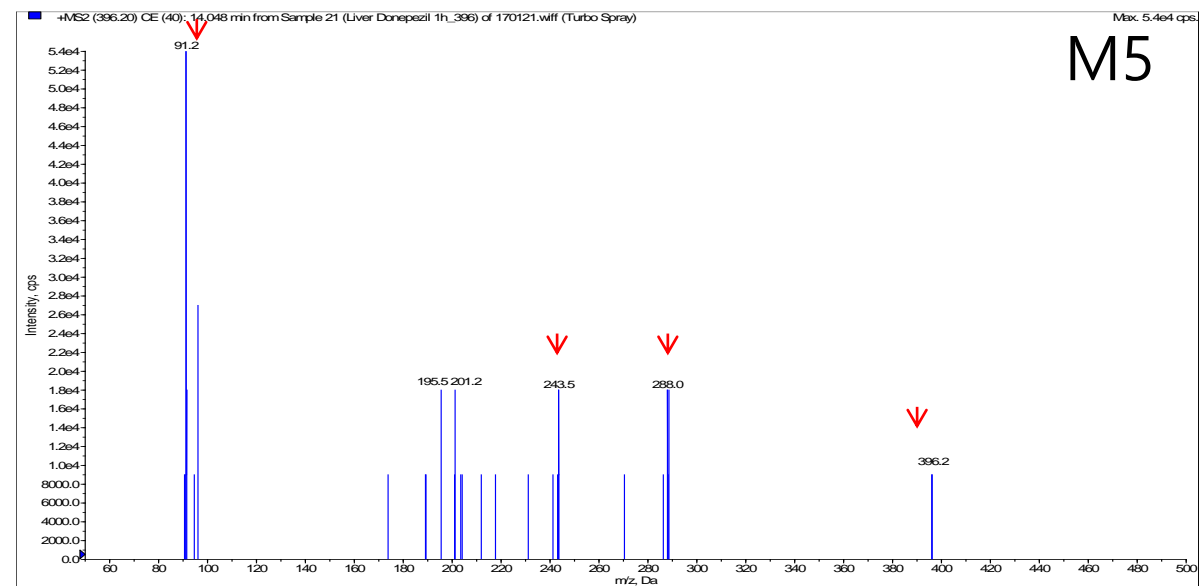

# (E) M6 and M7: Product ion scan for $m/z$ 396

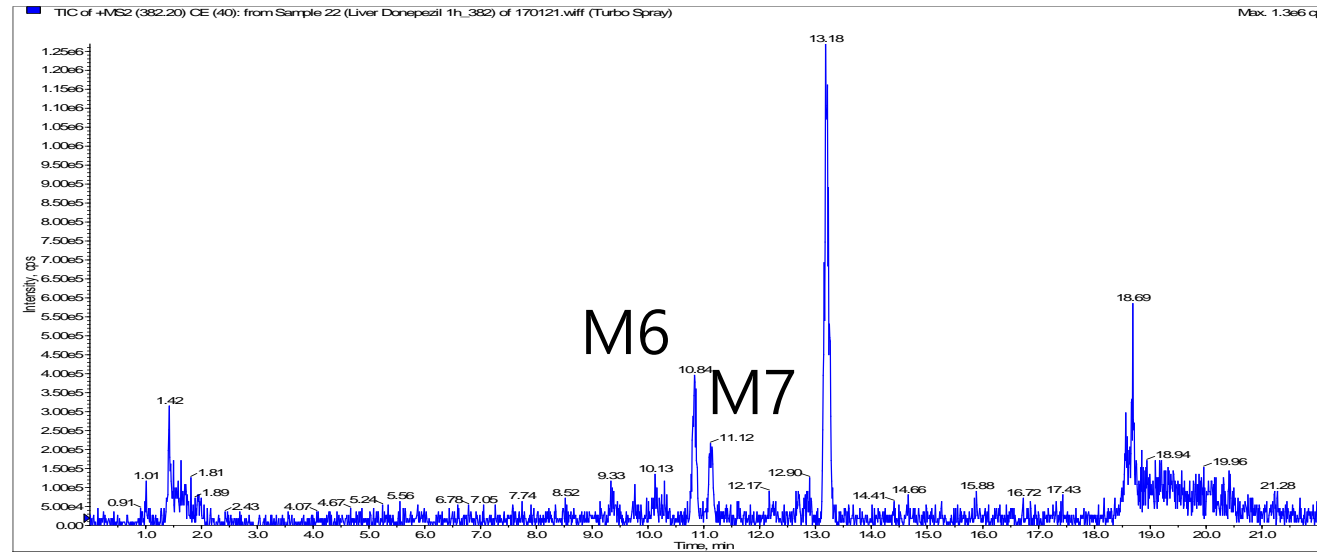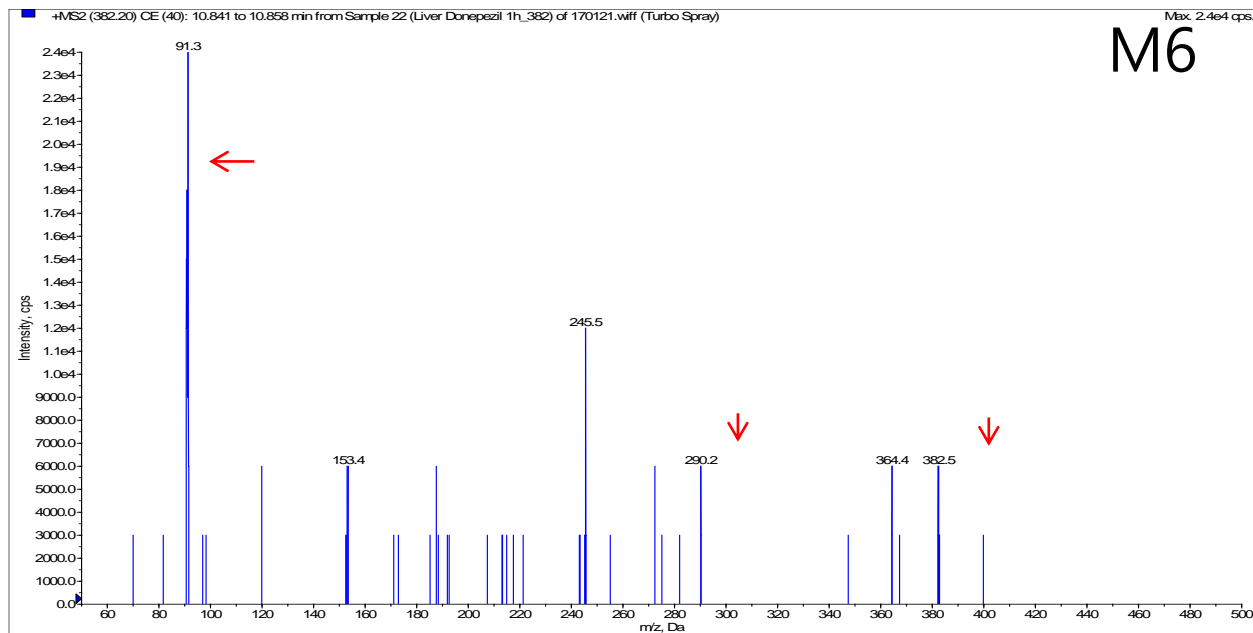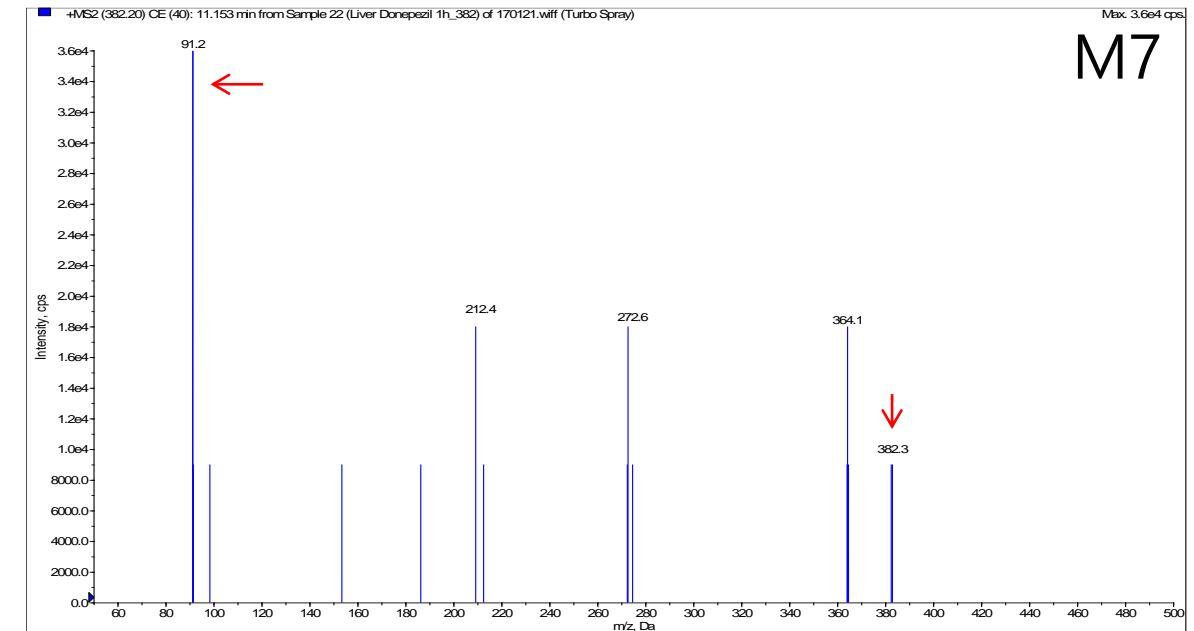

**Supplementary data 2. UHPLC-UV chromatogram of  $\gamma$ -mangostin and  $\alpha$ -mangostin in WMP. As a quantitative analytical result, WMP was found to contain 0.95 % and 0.10 % (w/w) of  $\alpha$ -mangostin and  $\gamma$ -mangostin, respectively, in WMP.**

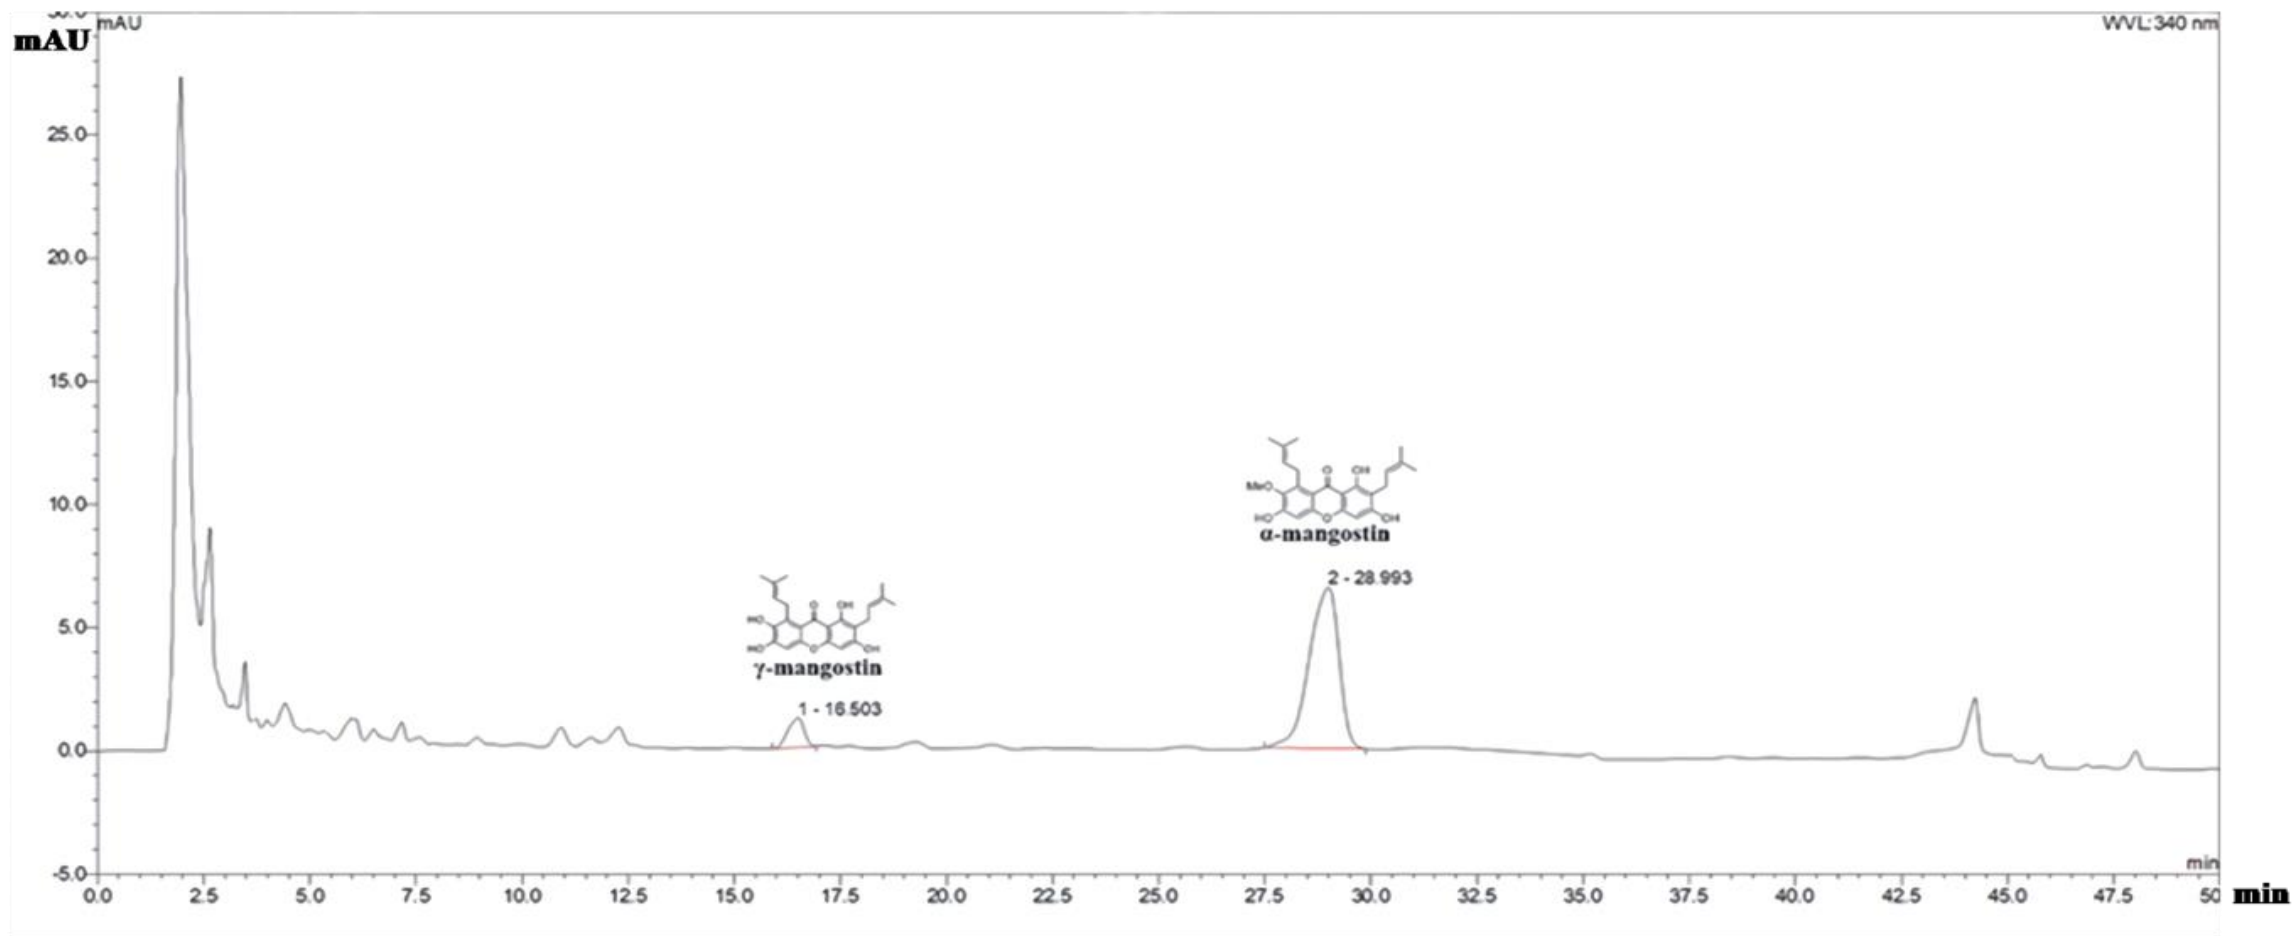

Supplement: s1 [file molecules-1335986-supplementary.pdf › molecules-1335986-supplementary.pdf]
